# Supplementary material for: Effects of experimental nitrogen deposition on peatland carbon pools and fluxes: a modelling analysis
Source: Copernicus journal article supplement (doi:10.5194/bg-12-79-2015), 2015-01-07
Supplement: Supplementary file 1 [file bg-12-79-2015-supplement.pdf]

Supplement of Biogeosciences, 12, 79–101, 2015  
<http://www.biogeosciences.net/12/79/2015/>  
doi:10.5194/bg-12-79-2015-supplement  
© Author(s) 2015. CC Attribution 3.0 License.

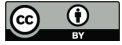

*Supplement of*

## **Effects of experimental nitrogen deposition on peatland carbon pools and fluxes: a modelling analysis**

**Y. Wu et al.**

*Correspondence to:* C. Blodau ([christian.blodau@uni-muenster.de](mailto:christian.blodau@uni-muenster.de))

Figure 1 Simulated ratios between annual root and shoot growth ( $\text{gC m}^{-2} \text{yr}^{-1}$ ) (a) and GPP ( $\text{gC m}^{-2} \text{yr}^{-1}$ ) (b) in graminoids with the original parameterization and in modification 3.

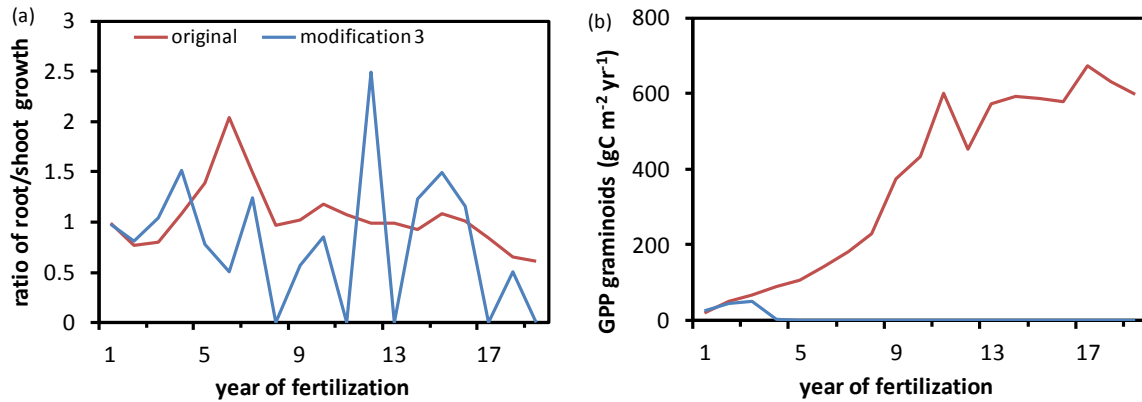

Figure 2 (a) Simulated C/N ratio ( $\text{g C g N}^{-1}$ ) of the upper 40cm peat and the (b) annual average net ecosystem carbon balance (unit:  $\text{g C m}^{-2} \text{yr}^{-1}$ ) in the Mer Bleue Bog subject to 130 years of fertilization at  $6.4 \text{ g N m}^{-2} \text{yr}^{-1}$ .

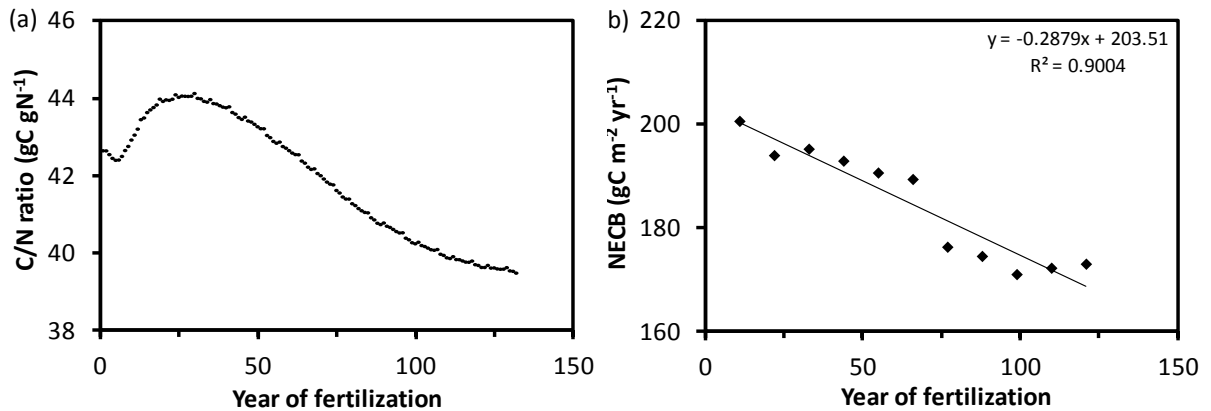

**Table 1 The dependency of  $GEP_{max}$  on leaf N content in graminoids and shrubs in the original and modified model in Figure 8.**

| N content<br>( $gN\ m^{-2}$ )<br>( $N_{foliar}$ ) | N factor on $GEP_{max}$ ( $fN_{GEP}$ ) for graminoids |                             |                             | N factor on $GEP_{max}$ for shrubs |                                  |
|---------------------------------------------------|-------------------------------------------------------|-----------------------------|-----------------------------|------------------------------------|----------------------------------|
|                                                   | Original and<br>modification 1*                       | Modification 2 <sup>†</sup> | Modification 3 <sup>†</sup> | Original*                          | Modification 1 to 3 <sup>†</sup> |
| 0                                                 | 0                                                     | 0                           | 0                           | 0                                  | 0                                |
| 0.25                                              | 0                                                     | 0                           | 0                           | 0                                  | 0.25                             |
| 0.5                                               | 0                                                     | 0                           | 0                           | 0                                  | 0.5                              |
| 0.75                                              | 0.325                                                 | 0.038                       | 0.038                       | 0.167                              | 0.335                            |
| 1                                                 | 0.55                                                  | 0.25                        | 0.25                        | 0.333                              | 0.21                             |
| 1.25                                              | 0.775                                                 | 0.463                       | 0.463                       | 0.5                                | 0.11                             |
| 1.5                                               | 1                                                     | 0.675                       | 0.675                       | 0.667                              | 0.08                             |
| 1.75                                              | 1                                                     | 0.9                         | 0.9                         | 0.833                              | 0.06                             |
| 2                                                 | 1                                                     | 1                           | 1                           | 1                                  | 0.05                             |
| 2.25                                              | 1                                                     | 1                           | 0.97                        | 1                                  | 0.04                             |
| 2.5                                               | 1                                                     | 0.945                       | 0.86                        | 1                                  | 0.035                            |
| 2.75                                              | 1                                                     | 0.825                       | 0.01                        | 1                                  | 0.03                             |
| 3                                                 | 1                                                     | 0.645                       | 0.01                        | 1                                  | 0.025                            |
| 3.25                                              | 1                                                     | 0.5                         | 0.01                        | 1                                  | 0.01                             |
| 3.5                                               | 1                                                     | 0.39                        | 0.01                        | 1                                  | 0.01                             |
| 3.75                                              | 1                                                     | 0.325                       | 0.01                        | 1                                  | 0.01                             |
| 4                                                 | 1                                                     | 0.275                       | 0.01                        | 1                                  | 0.01                             |

\* The original equations of the N factor on  $GEP_{max}$  ( $fN_{GEP}$ ) for graminoids and shrubs are linear:

$$fN_{GEP} = \begin{cases} 0 & \text{if } 0 \leq N_{foliar} < N_{min} \\ aN_{foliar} - b & \text{if } N_{min} \leq N_{foliar} < N_{opt} \\ 1 & \text{if } N_{opt} \leq N_{foliar} \end{cases} \quad \text{Eqn. 1}$$

Parameter a and b are the slope and the interception of the linear equation. The values of a and b for the graminoids and the shrubs are listed in Table 2. The parameters of equation 1 are derived from Figure 1 in Hikosaka et al. (2004).

**Table 2: Parameter values of  $GEP_{max}$  as a linear function of foliar N content ( $N_{foliar}$ )**

| Parameter                  | Description                         | Graminoids | Shrubs |
|----------------------------|-------------------------------------|------------|--------|
| a                          | Slope of the linear function        | 0.90       | 0.67   |
| b                          | Interception of the linear function | -0.35      | 0.00   |
| $N_{min}$ ( $gN\ m^{-2}$ ) | Minimum N content in leaves         | 0.50       | 0.00   |
| $N_{opt}$ ( $gN\ m^{-2}$ ) | Optimal N content in leaves         | 1.50       | 2.00   |

† The modified equations of the N factors on  $GEP_{max}$  for graminoids and shrubs are hyperbolic:

$$fN_{GEP} = \begin{cases} 0 & \text{if } 0 \leq N_{foliar} < N_{min} \\ 1 - \tanh(\alpha_1(N_{opt} - N_{foliar})/N_{opt})^{\beta_1} & \text{if } N_{min} \leq N_{foliar} < N_{opt} \\ 1 - \tanh(\alpha_2(N_{foliar} - N_{opt})/N_{opt})^{\beta_2} & \text{if } N_{opt} \leq N_{foliar} < N_{max} \\ 0 & \text{if } N_{max} \leq N_{foliar} \end{cases} \quad \text{Eqn. 2}$$

The curvature parameter  $\alpha$  and  $\beta$  determines the sensitivity of the photosynthetic capacity ( $GEP_{max}$ ) to the N content in leaves ( $N_{foliar}$ ). Large values of  $\alpha$  indicate low  $GEP_{max}$  and slow change of  $GEP_{max}$  approaching the minimum and the highest N content ( $N_{min}$  and  $N_{max}$ ). Large values of  $\beta$  indicate slow change of  $GEP_{max}$  approaching the optimal N content  $N_{opt}$ . For example, larger  $\alpha_2$  and  $\beta_2$  in Modification 3 than in Modification 2 for graminoids imply a faster decline of  $GEP_{max}$  above the  $N_{opt}$  in modification 3. The minimum and optimal foliar N content for photosynthesis is lower in the shrubs than in the graminoids, indicating that shrubs are more limited to N and more conservative in their N consumption. The parameter values in equation 2 for the modifications are shown in Table 3.

**Table 3: Parameter values of GEPmax as hyperbolic functions of foliar N content ( $N_{\text{foliar}}$ )**

| Parameter        | Description                 | Graminoids<br>Modification 2 | Graminoids<br>Modification 3 | Shrubs<br>Modification 1 to 3 |
|------------------|-----------------------------|------------------------------|------------------------------|-------------------------------|
| $\alpha_1$       | Curvature parameter         | 4                            | 3                            | 2                             |
| $\beta_1$        | Curvature parameter         | 8                            | 2.5                          | 2                             |
| $\alpha_2$       | Curvature parameter         | 1.5                          | 4                            | 1                             |
| $\beta_2$        | Curvature parameter         | 1.7                          | 8                            | 2                             |
| $N_{\text{min}}$ | Minimum N content in leaves | 0.5                          | 0.5                          | 0                             |
| $N_{\text{max}}$ | Maximum N content in leaves | /                            | 2.5                          | /                             |
| $N_{\text{opt}}$ | Optimal N content in leaves | 2.2                          | 2                            | 0.5                           |

### Conceptual relations between GEPmax and leaf N content

Based on Table 2, a relation between  $GEP_{\text{max}}$  and leaf N content can be expressed as:

$$GEP_{\text{max}} = \tanh\left(\frac{\alpha|N_{\text{opt}} - N_{\text{foliar}}|}{N_{\text{opt}}}\right)^\beta$$

The  $N_{\text{opt}}$  represents the optimal N level in the leaves for the photosynthetic capacity. The curvature parameters  $\alpha$  and  $\beta$  determine the sensitivity of the photosynthetic capacity ( $GEP_{\text{max}}$ ) to the N content in leaves ( $N_{\text{foliar}}$ ). Large values of  $\alpha$  indicate low  $GEP_{\text{max}}$  and slow change of  $GEP_{\text{max}}$  approaching the low and high end of N content. Large values of  $\beta$  indicate slow change of  $GEP_{\text{max}}$  approaching the optimal N content  $N_{\text{opt}}$ . Small  $\alpha$  and large  $\beta$  values characterize a high ability utilize foliar N on photosynthesis and vice versa. While the  $N_{\text{opt}}$  level has been often identified from empirical data,  $\alpha$  and  $\beta$  values are highly uncertain. In order to predict the effect of N on C fluxes and vegetation in peatlands, the  $\alpha$  and  $\beta$  parameters need to be determined for different PFTs and a growth strategy to be identified.

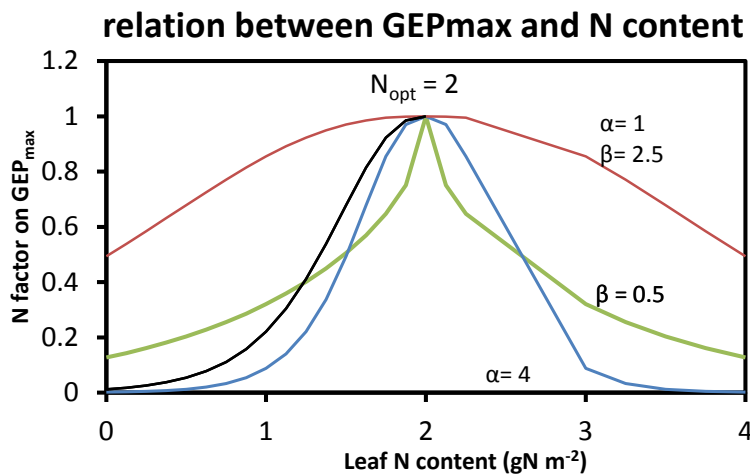

References:

Hikosaka, K.: Interspecific difference in the photosynthesis-nitrogen relationship: patterns, physiological causes, and ecological importance, *Journal of Plant Research*, 117, 481-494, 10.1007/s10265-004-0174-2, 2004.
